# Supplementary material for: The link between mechanisms of deposition and the physico-chemical properties of plasma polymer films
Source: Royal Society of Chemistry journal article supplement (doi:10.1039/c3sm51039e), 2013-01-01
Supplement: c3sm51039e.pdf [file c3sm51039e.pdf]

# The link between mechanisms of deposition and the physico-chemical properties of plasma polymer films

Andrew Micheltore\*, David A. Steele, David E. Robinson, Jason D. Whittle, Robert D. Short

Mawson Institute, University of South Australia, Mawson Lakes Campus, Mawson Lakes, SA, Australia, 5095

## Supporting Information

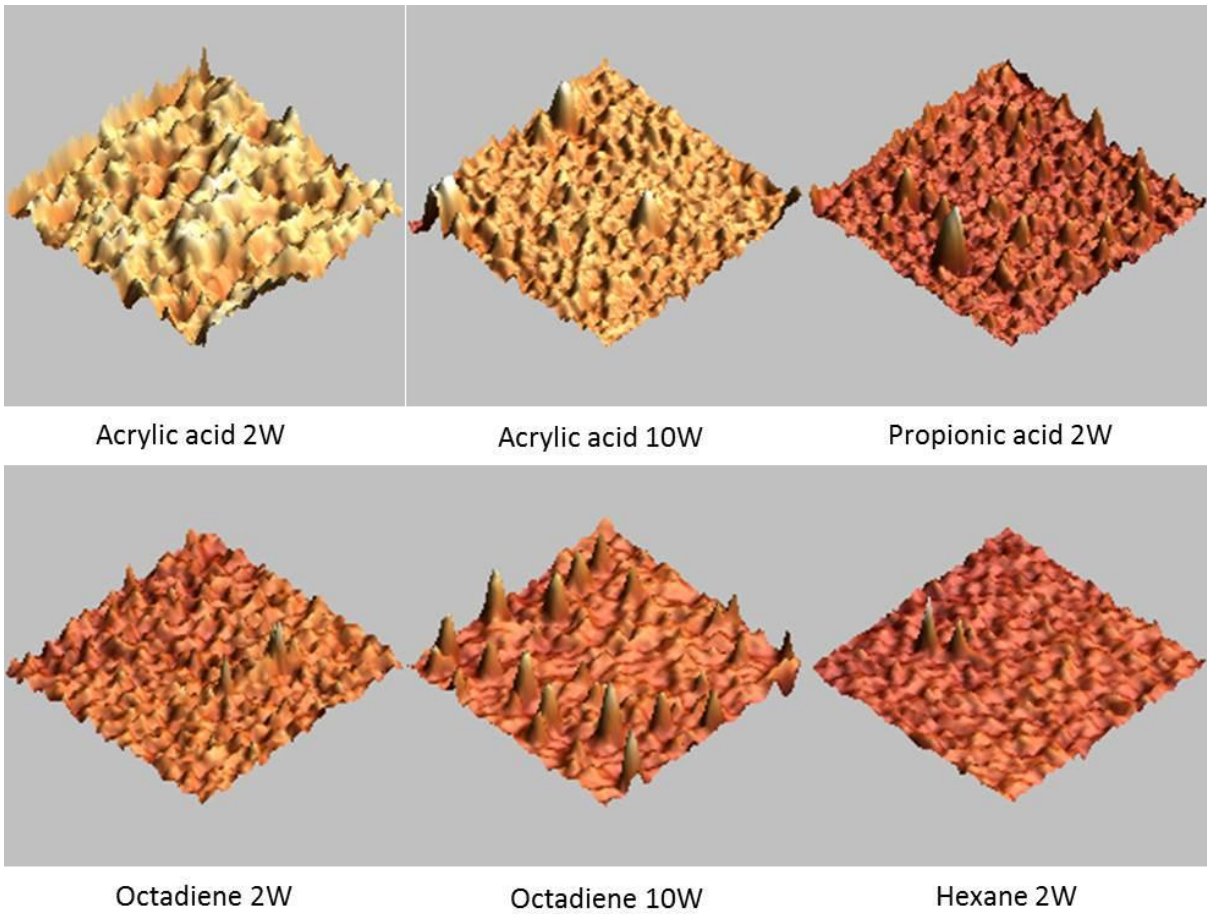

Figure S1. 1x1  $\mu\text{m}$  AFM images of plasma polymer films

|                 |                  |                   |
|-----------------|------------------|-------------------|
| 0.45            | 0.38             | 0.38              |
| Acrylic acid 2W | Acrylic acid 10W | Propionic acid 2W |
|                 |                  |                   |
| 0.39            | 0.46             | 0.31              |
| Octadiene 2W    | Octadiene 10W    | Hexane 2W         |

Table S1. RMS roughness of plasma polymer films in nm
